# Supplementary material for: Induction of the Metabolic Regulator Txnip in Fasting-Induced and Natural Torpor
Source: PubMed Central journal article supplement — Endocrinology. 2013 Apr 12;154(6):2081–91. doi: 10.1210/en.2012-2051 (PMC3740491; doi:10.1210/en.2012-2051), 2013-04-12
Supplement: supp_en.2012-2051_EN-12-2051_3Figs_1Tab.pdf [file supp_en.2012-2051_EN-12-2051_3Figs_1Tab.pdf]

EN-12-2051

**Supplemental Figure 1. *Hprt1* expression in two lines of *Gpr50*<sup>-/-</sup> mice and absence of fasting-induced torpor in *Hprt1*<sup>-/-</sup> mice.**

Quantitative RT-PCR analyses of *Hprt1* in the hypothalamus of WT and *Gpr50*<sup>-/-</sup> mice obtained from DeltaGen (**A**; n=8/group) and Organon Pharmaceuticals (**B**; n=5/group), show near total loss of *Hprt1* expression in the DeltaGen *Gpr50*<sup>-/-</sup> mice, but no significant difference in expression between Organon *Gpr50*<sup>-/-</sup> and WT mice. **C**, Core body temperature ( $T_b$ ) of WT and *Hprt1*<sup>-/-</sup> mice subject to a 24 h fast was monitored by remote telemetry. No drop in  $T_b$  indicative of torpor was observed in *Hprt1*<sup>-/-</sup> mice. Lighting schedule is represented by black and white boxes; representative recordings of three independent experiments. **D**, *Gpr50*<sup>-/-</sup> mice obtained from Organon Pharmaceuticals exhibit torpor upon fasting with a similar temporal depth and profile as *Gpr50*<sup>-/-</sup> obtained from DeltaGen. Grey bar indicates period of fasting. **E**, Confirmation of microarray results using *Gpr50*<sup>-/-</sup> mice obtained from Organon Pharmaceuticals by quantitative RT-PCR. As in the mice obtained from DeltaGen, *Txnip* expression was significantly increased in the hypothalamus of this line of *Gpr50*<sup>-/-</sup> mice. Data are mean  $\pm$  SEM, normalised to mouse *18S rRNA* control, and as fold-change relative to WT fed mice; \*\*\* $P < 0.001$ , fed vs fasted; ### $P < 0.001$ , torpid vs normothermic animals two-way ANOVA with Bonferroni's post-hoc test.

**Supplemental Figure 2. *Txnip* expression in female *Gpr50*<sup>-/-</sup> mice.**

21 Quantitative RT-PCR analysis of *Txnip* expression in tissues of female *Gpr50*<sup>-/-</sup> mice fed *ad libitum* or fasted (n=4/group). As in male *Gpr50*<sup>-/-</sup> mice, fasting induced a state of torpor (T), as assessed by body temperature at the time of sacrifice, except in one animal, which did not enter or was aroused from torpor. Torpor caused significant increases in *Txnip* expression in all tissues studied ( $P < 0.01$ ), whereas in the fasted normothermic (NT) animal, levels of *Txnip* were comparable to those in the fed group. Data are normalised to mouse *18S rRNA* control, and as fold-change relative to fed mice; statistical significance was determined using one-way ANOVA with Bonferroni's post-hoc test.

**Supplemental Figure 3. RT-PCR profiling of *Txnip* expression in murine tissues.**

# Supplemental Figure 1

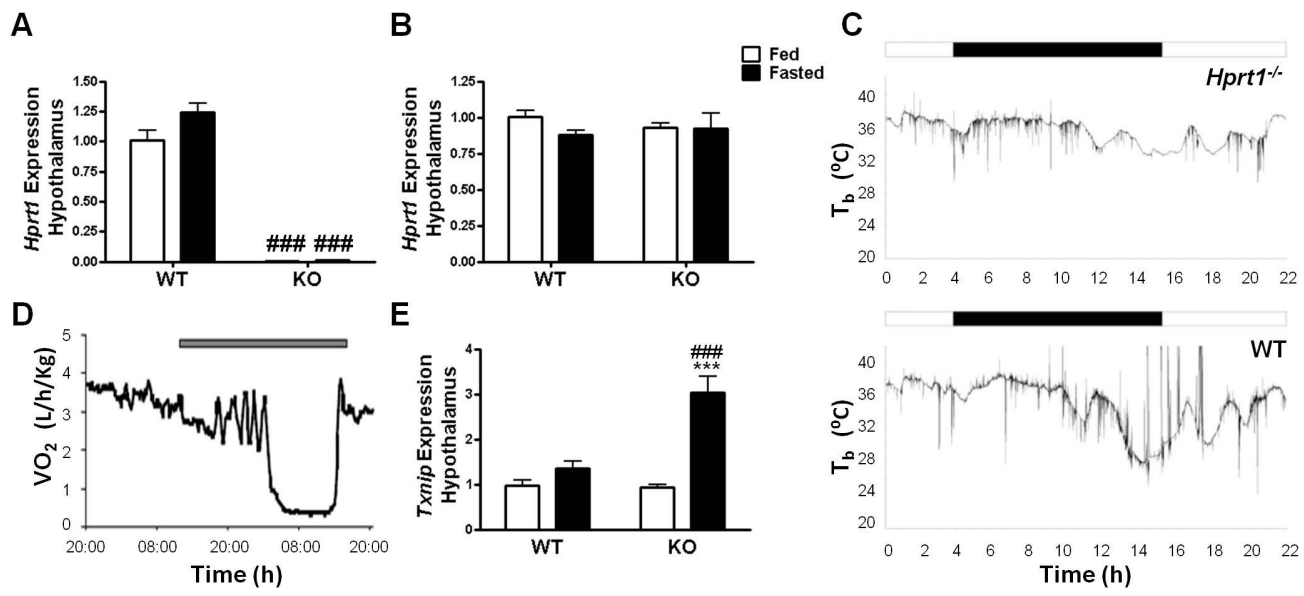

# Supplemental Figure 2

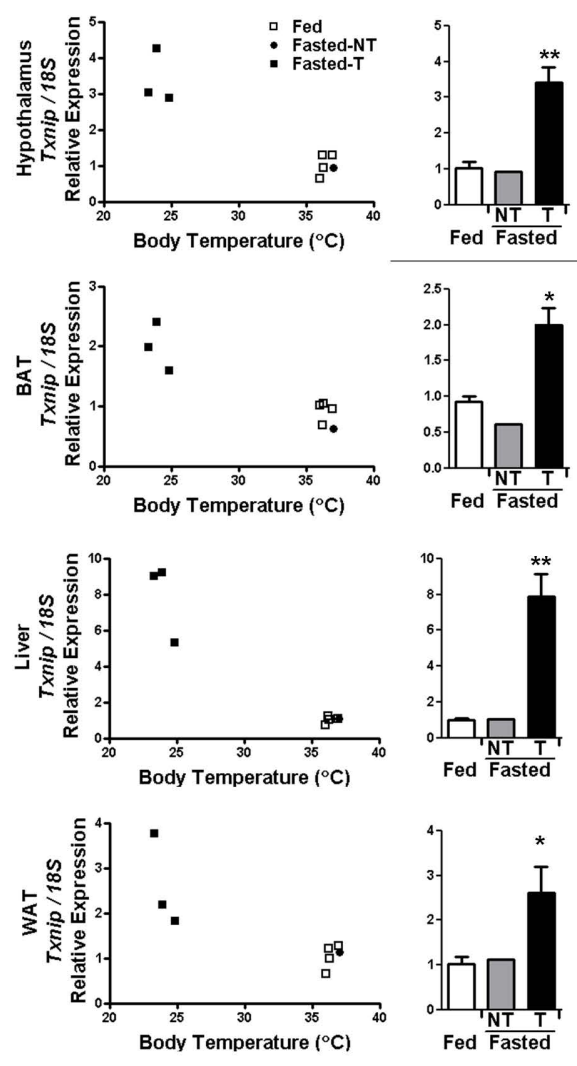

# Supplemental Figure 3

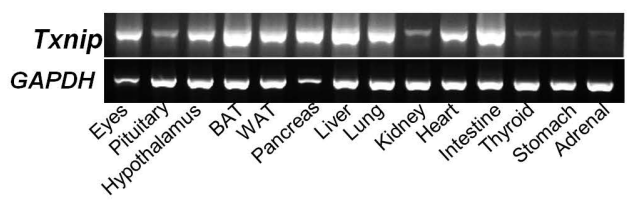

**Supplemental Table 1. Altered transcripts in the hypothalamus of fasted *Gpr50*<sup>-/-</sup> vs. fasted WT mice.**

| <b>Gene</b>      | <b>Description</b>                                        | <b>ID</b>    | <b>q Value</b> | <b>Fold Change</b> |
|------------------|-----------------------------------------------------------|--------------|----------------|--------------------|
| <b>Txnip</b>     | thioredoxin interacting protein                           | NM_001009935 | 0.010          | 2.55               |
| <b>Hist1h1c</b>  | histone cluster 1, H1c                                    | NM_015786    | 0.009          | 2.49               |
| <b>Foxf1a</b>    | forkhead box F1a                                          | NM_010426    | 0.010          | 2.02               |
| <b>Btf3l4</b>    | basic transcription factor 3-like 4                       | NM_027453    | 0.010          | 1.96               |
| <b>Nat12</b>     | N-acetyltransferase 12                                    | NM_001081430 | 0.010          | 1.78               |
| <b>Csrnp1</b>    | cysteine-serine-rich nuclear protein 1                    | NM_153287    | 0.009          | 1.63               |
| <b>Myd116</b>    | myeloid differentiation primary response gene 116         | NM_008654    | 0.002          | 1.59               |
| <b>H3f3b</b>     | H3 histone, family 3B                                     | NM_008211    | 0.010          | 1.58               |
| <b>Ppm1b</b>     | protein phosphatase 1B, magnesium dependent, beta isoform | NM_001159496 | 0.009          | 1.50               |
| <b>Yod1</b>      | YOD1 OTU deubiquitinating enzyme 1 homologue              | NM_178691    | 0.009          | 1.50               |
| <b>Id1</b>       | inhibitor of DNA binding 1                                | NM_010495    | 0.009          | 1.49               |
| <b>Hist1h2be</b> | histone cluster 1, H2be                                   | NM_178194    | 0.007          | 1.45               |
| <b>Lsamp</b>     | limbic system-associated membrane protein                 | NM_175548    | 0.000          | 1.44               |
| <b>Tardbp</b>    | TAR DNA binding protein                                   | NM_145556    | 0.010          | 1.44               |
| <b>Ap1g2</b>     | adaptor protein complex AP-1, gamma 2 subunit             | NM_007455    | 0.009          | 1.30               |
| <b>Rrh</b>       | retinal pigment epithelium derived rhodopsin homolog      | NM_009102    | 0.010          | 1.24               |
| <b>Accn3</b>     | amiloride-sensitive cation channel 3                      | NM_183000    | 0.009          | 1.22               |
| <b>Cml5</b>      | camello-like 5                                            | NM_023493    | 0.010          | 1.20               |
| <b>Abcd4</b>     | ATP-binding cassette, sub-family D (ALD), member 4        | NM_008992    | 0.005          | -1.20              |
| <b>Fam161b</b>   | family with sequence similarity 161, member B             | NM_172581    | 0.009          | -1.25              |
| <b>Osbp11</b>    | oxysterol binding protein-like 11                         | NM_176840    | 0.010          | -1.27              |
| <b>Hps5</b>      | Hermansky-Pudlak syndrome 5 homolog (human)               | NM_001005247 | 0.010          | -1.27              |
| <b>Dusp11</b>    | dual specificity phosphatase 11                           | NM_028099    | 0.002          | -1.31              |
| <b>Fancg</b>     | Fanconi anemia, complementation group G                   | NM_053081    | 0.000          | -1.32              |
| <b>Zfp128</b>    | zinc finger protein 128                                   | NM_153802    | 0.009          | -1.34              |
| <b>Gpr75</b>     | G protein-coupled receptor 75                             | NM_175490    | 0.010          | -1.36              |
| <b>Zfp27</b>     | zinc finger protein 27                                    | NM_001037707 | 0.010          | -1.36              |
| <b>Zfp454</b>    | zinc finger protein 454                                   | NM_172794    | 0.007          | -1.41              |
| <b>Zfp324</b>    | zinc finger protein 324                                   | NM_178732    | 0.009          | -1.41              |
| <b>Zfp111</b>    | zinc finger protein 111                                   | NM_019940    | 0.010          | -1.48              |
| <b>Cpne1</b>     | copine I                                                  | NM_170588    | 0.010          | -1.49              |
| <b>Stradb</b>    | STE20-related kinase adaptor beta                         | NM_172656    | 0.010          | -1.51              |
| <b>Rqcd1</b>     | required for cell differentiation homolog 1 (S. pombe)    | NM_021383    | 0.009          | -1.58              |
| <b>Ttf1</b>      | transcription termination factor, RNA polymerase I        | NM_009442    | 0.010          | -1.59              |
| <b>Shc2</b>      | Src homology 2 domain containing transforming protein     | NM_001024539 | 0.009          | -1.59              |
| <b>Tmem126b</b>  | transmembrane protein 126B                                | NM_026734    | 0.010          | -1.60              |
| <b>Zscan22</b>   | zinc finger and SCAN domain containing 22                 | NM_001001447 | 0.010          | -1.62              |
| <b>Gabrq</b>     | gamma-aminobutyric acid A receptor, subunit theta         | NM_020488    | 0.007          | -2.22              |
| <b>Sfrs5</b>     | splicing factor, arginine/serine-rich 5 (SRp40, HRS)      | NM_001079695 | 0.009          | -2.26              |
| <b>Hprt1</b>     | hypoxanthine guanine phosphoribosyl transferase 1         | NM_013556    | 0.000          | -33.66             |
